# Supplementary material for: Dose-Dependent Inhibitory Effect of Probiotic Lactobacillus plantarum on Streptococcus mutans-Candida albicans Cross-Kingdom Microorganisms
Source: MDPI journal article supplement (doi:10.3390/pathogens12060848), 2023-06-20
Supplement: s1 [file s1]

## Supplement

**Table S1. Genes of interest**

| Microorganisms      | Genes         | Function                                 |
|---------------------|---------------|------------------------------------------|
| <i>L. plantarum</i> | <i>plnA</i>   | Encode plantaricins                      |
|                     | <i>plnN</i>   | Encode plantaricins                      |
|                     | <i>PcrA</i>   | ATP-dependent DNA helicase               |
|                     | <i>atpD</i>   | ATPase complex and acid tolerance        |
| <i>S. mutans</i>    | <i>eno</i>    | Putative enolase                         |
|                     | <i>lacC/G</i> | Galactose metabolism                     |
|                     | <i>HWPI</i>   | Hyphal growth and adhesion to host cells |
| <i>C. albicans</i>  | <i>ECE1</i>   | Hyphal growth and adhesion to host cells |
|                     | <i>CHT2</i>   | Fungal cell wall chitin remodeling       |
|                     | <i>ERG4</i>   | Antifungal medication resistance         |

**Table S2. Primers used in RT-qPCR [27]**

| Genes       | Primers     | Sequence                  | Amplicon size (bp) |
|-------------|-------------|---------------------------|--------------------|
| <i>atpD</i> | Sm_atpD_F   | TGTTGATGGTCTGGGTGAAA      | 176                |
|             | Sm_atpD_R   | TTTGACGGTCTCCGATAACC      |                    |
| <i>eno</i>  | Sm_eno_F    | CAGCGTCTTCAGTTCCATCA      | 194                |
|             | Sm_eno_R    | TCACTCAGATGCTCCAATCG      |                    |
| <i>lacG</i> | Sm_lacG_F   | ATTGGATGCGTGCTTTTGATGG    | 94                 |
|             | Sm_lacG_R   | CGACCGACACCCTTAATCTGG     |                    |
| <i>lacC</i> | Sm_lacC_F   | GCTGGAATTACATCGGCTCTTGC   | 157                |
|             | Sm_lacC_R   | CCTCCGCTACCTCAATTTGTTGG   |                    |
| <i>ACT1</i> | Ca_ACT1_F   | TGCTCCAGAAGAACACCCA       | 182                |
|             | Ca_ACT1_R   | CACCTGAATCCAAAACAATACCAGT |                    |
| <i>HWP1</i> | Ca_HWP1_F   | TGGTGCTATTACTATTCCGG      | 182                |
|             | Ca_HWP1_R   | CAATAATAGCAGCACCGAAG      |                    |
| <i>ECE1</i> | Ca_ECE1_F   | GCTGGTATCATTGCTGATAT      | 168                |
|             | Ca_ECE1_R   | TTCGATGGATTGTTGAACAC      |                    |
| <i>CHT2</i> | Ca_CHT2_F   | TTGGGATGCTTCTGGGGCTT      | 111                |
|             | Ca_CHT2_R   | GCAGAAGAAGATGGGGCAACAC    |                    |
| <i>ERG4</i> | Ca_ERG4_F   | TCAAATGTGCCAATGGTTCT      | 101                |
|             | Ca_ERG4_R   | AGCCCAAGTCAATGTTTGAA      |                    |
| <i>rpoB</i> | Lp14_rpoB_F | CACCGTACCCGTAGAAGTTATGC   | 106                |
|             | Lp14_rpoB_R | GGAGACCTTGATCCAAGAACCA    |                    |
| <i>pcrA</i> | Lp14_pcrA_F | AGGAGGTCTGGGTCTCAACG      | 118                |
|             | Lp14_pcrA_R | AAGGTCCGTTGCTCGCTAGT      |                    |
| <i>plnN</i> | Lp14_plnN_F | ATTGCCGGGTTAGGTATCG       | 146                |
|             | Lp14_plnN_R | CCTAAACCATGCCATGCAC       |                    |
| <i>plnA</i> | Lp14_plnA_F | GTGGAAAGAGTAGTGCGTATTC    | 135                |
|             | Lp14_plnA_R | CGCCATCTATACGAAATATAACTTG |                    |

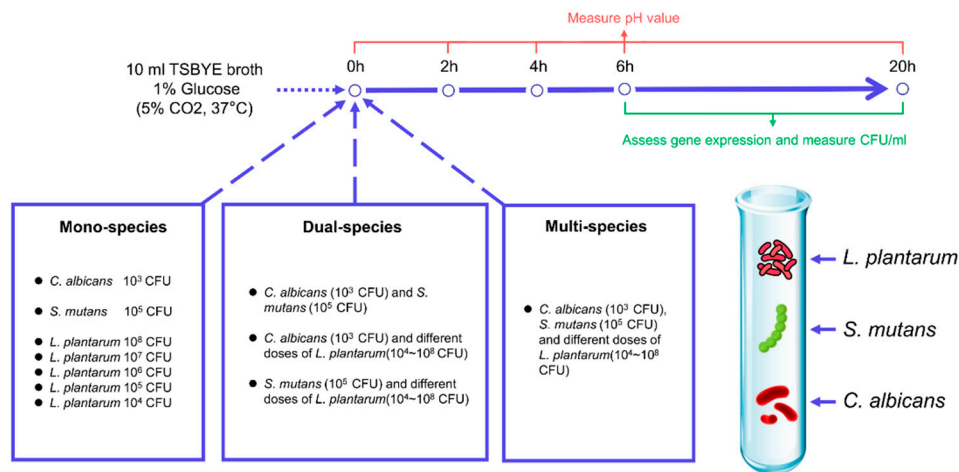

**Figure S1. Schematic study design**

The starting concentration for microorganisms was 10<sup>3</sup> CFU/ml for *C. albicans*, 10<sup>5</sup> CFU/ml for *S. mutans* and 10<sup>4</sup>–10<sup>8</sup> CFU/ml for *L. plantarum*. *C. albicans* (10<sup>3</sup> CFU/ml) and *S. mutans* (10<sup>5</sup> CFU/ml) were used to mimic high caries risk in a clinical condition. The maximum inoculation level of *L. plantarum* (10<sup>8</sup> CFU/ml) is the lower dose of probiotics utilized in commercial probiotic products (10<sup>9</sup>–10<sup>12</sup> CFU/ml as a single dosage). Mono-species, dual-species and multi-species model were used to assess the intervention between *C. albicans*, *S. mutans* and different doses of *L. plantarum* (10<sup>4</sup> – 10<sup>8</sup> CFU/ml).

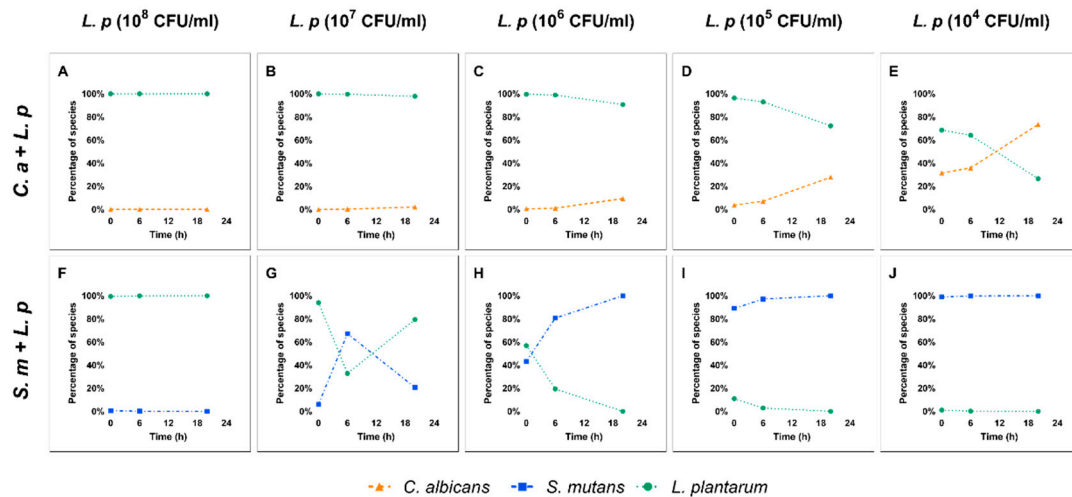

**Figure. S2. Changes of species composition in dual-species**

The composition of each microorganism in dual-species were showed. (A–E) The composition of *C. albicans* and *L. plantarum* in dual-species condition. (F–J) The composition of *S. mutans* and *L. plantarum* in dual-species condition.

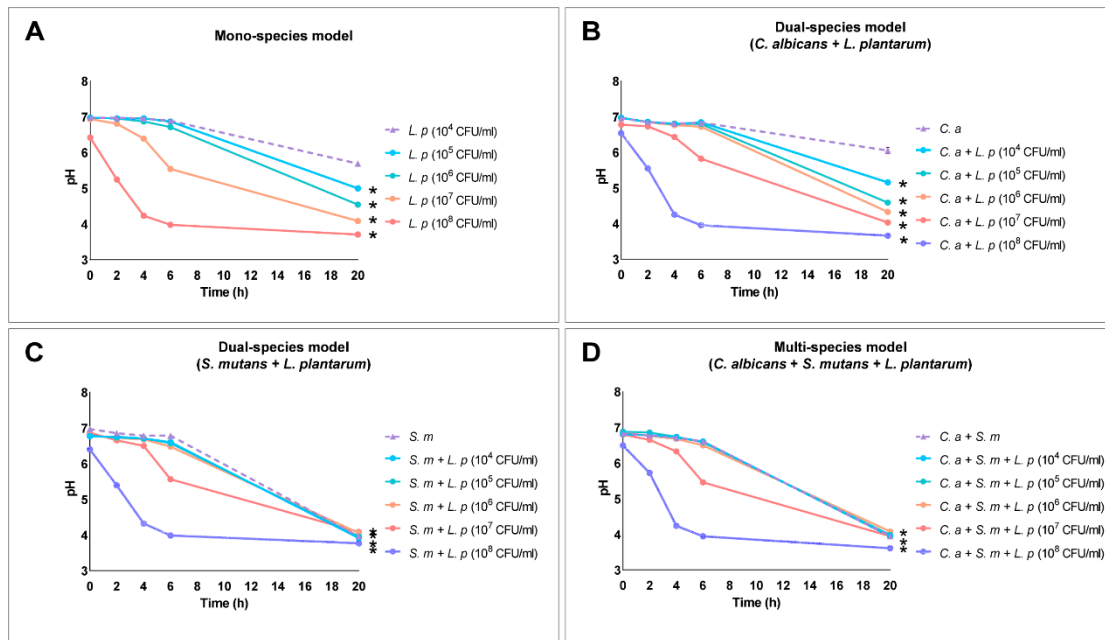

**Figure. S3. pH in culture media**

(A) pH in mono-species condition. (B) pH in *C. albicans* presence dual-species condition. (C) pH in *S. mutans* presence dual-species condition. (D) pH in multi-species condition. pH decreased faster and to lower value by adding a high concentration of  $10^8$  CFU/ml *L. plantarum*. The dotted line represents the control groups in each model. \* Indicates the pH values of other groups were significantly different from the pH values of the control group at 20 h ( $p < 0.05$ ).

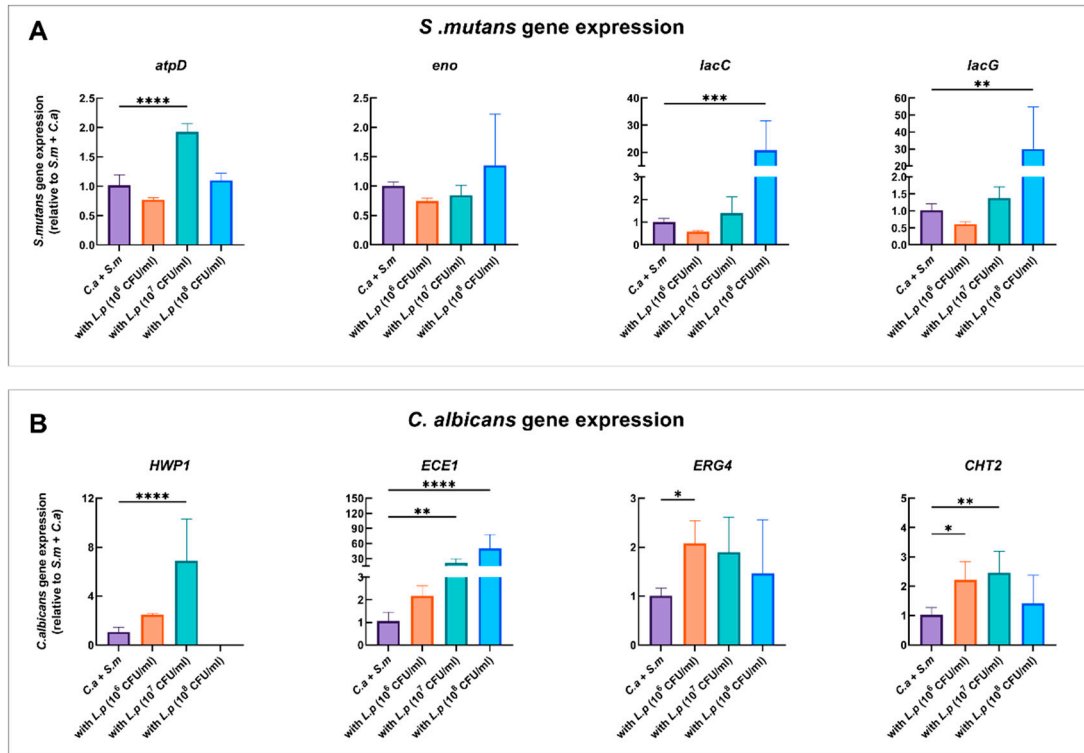

**Figure. S4. Effect of *L. plantarum* on the expression of *C. albicans* and *S. mutans* genes in multi-species model at six hours**

qRT-PCR was performed for *S. mutans* and *C. albicans* genes of interest for mixed-species culture at 6 h. *S. mutans* (A) and *C. albicans* (B) gene expression ratio was shown, the comparison was relative to *S. mutans* and *C. albicans* dual-species. p values were determined by one-way ANOVA with post hoc test. \* $p < 0.05$ , \*\* $p < 0.01$ , \*\*\* $p < 0.001$ , \*\*\*\* $p < 0.0001$ .

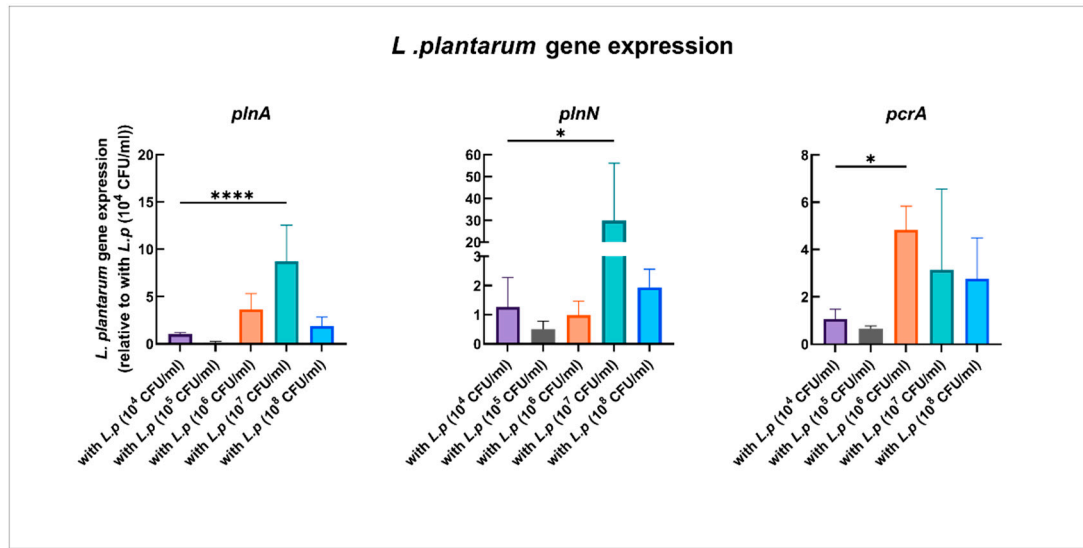

**Figure. S5. Dose-related expression of *L. plantarum* gene in multi-species model at twenty hours**

qRT-PCR was performed for *L. plantarum* genes of interest for mixed-species at 20 h. *L. plantarum* gene expression ratio was shown, the comparison was relative to  $10^4$  CFU/ml *L. plantarum* multi-species group. p values were determined by one-way ANOVA with post hoc test. \* $p < 0.05$ , \*\* $p < 0.01$ , \*\*\* $p < 0.001$ , \*\*\*\* $p < 0.0001$ .

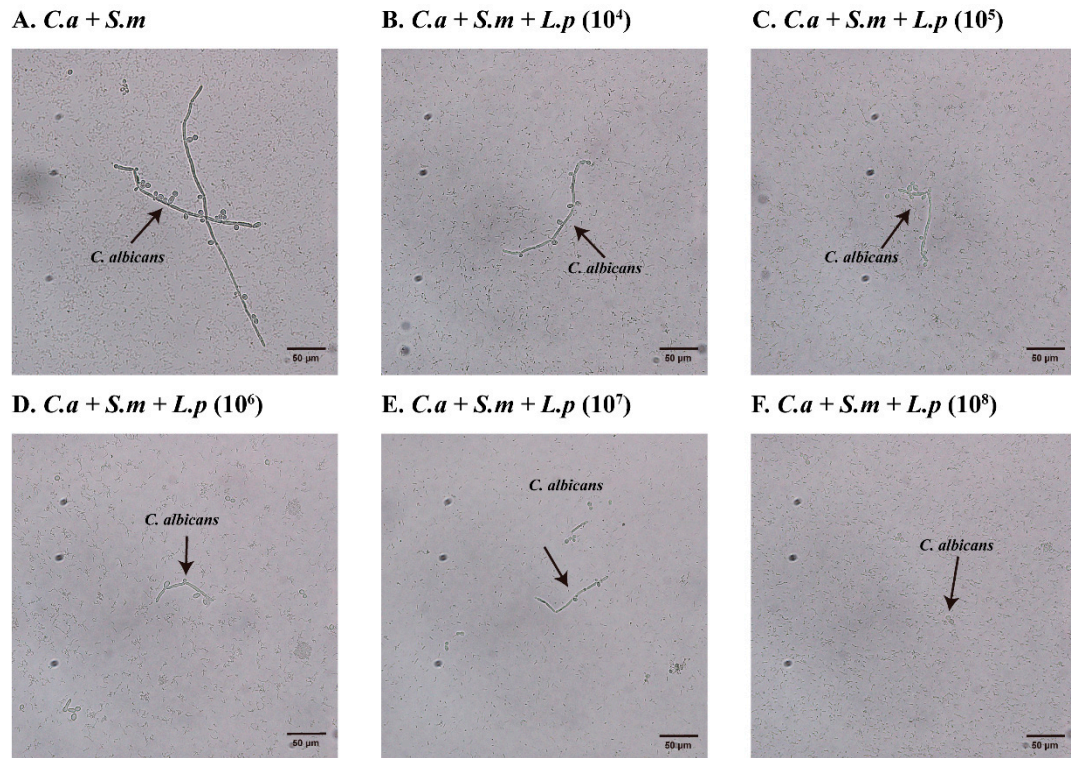

**Figure S6: Dose-dependent inhibition of *C. albicans* hyphae formation by *L. plantarum* gene in multi-species model at  $\times 20$  magnification (A–F)**
